# Supplementary material for: Adsorption of naphthalene onto high-surface-area nanoparticle loaded activated carbon by high performance liquid chromatography: response surface methodology, isotherm and kinetic study
Source: Royal Society of Chemistry journal article supplement (doi:10.1039/c6ra09500c), 2016-01-01
Supplement: c6ra09500c1.pdf [file c6ra09500c1.pdf]

1 **Electronic Supporting Information**

2

3 **Adsorption of naphthalene onto a high-surface-area nanoparticles loaded activated carbon by high**  
4 **performance liquid chromatography: Response surface methodology, isotherm and kinetic study**

5

6 Mehrorang Ghaedi<sup>a\*</sup>, Anahita Daneshyar<sup>a</sup>, Arash Asfaram<sup>a</sup>, Mihir Kumar Purkait<sup>b</sup>

7 <sup>a</sup> *Chemistry Department, Yasouj University, Yasouj 75918-74831, Iran*

8 <sup>b</sup> *Department of Chemical Engineering, Indian Institute of Technology Guwahati, Guwahati-781039, Assam, India.*

---

9

10

11

12

13

14

15

16

17

18

19

20

21

22

23

24

25

26

27

28

29

---

\*Corresponding author at: Tel.: +98 741 2223048; fax: +98 741 2223048.

E-mail address: [m\\_ghaedi@mail.yu.ac.ir](mailto:m_ghaedi@mail.yu.ac.ir); [m\\_ghaedi@yahoo.com](mailto:m_ghaedi@yahoo.com) (M. Ghaedi)

30 **Tables and figures of contents in Supplementary Material:**

---

31

32 **Table S1.** Experimental design based on central composite design (CCD).

33

34 **Fig. S1.**(a)Comparison of model predictions with the experimental data, (b) Predicted value of naphthalene  
35 adsorption vs. residual effects, (c) normal % probability versus internally studentized residuals and (d) Pareto chart  
36 for adsorption efficiency.

37

38 **Fig. S2.** Profiles for predicated values and desirability function for the removal percentage of naphthalene onto ZnS-  
39 NPs-AC. Dashed line indicated current values after optimization.

40

41 **Fig. S3.** (a) Langmuir, (b) Freundlich, (c) Temkin and (d) D–R adsorption isotherms for adsorption of naphthalene  
42 onto ZnS-NPs-AC (Initial naphthalene concentration = 5 to 50 mg L<sup>-1</sup>adsorbent mass: 0.02 g, sonication time: 15  
43 min and pH: 5.0).

44

45 **Table S1.** Experimental design based on central composite design (CCD).

| Factors                                            |         | Levels     |          |             |                       |                        |
|----------------------------------------------------|---------|------------|----------|-------------|-----------------------|------------------------|
|                                                    |         | - $\alpha$ | Low (-1) | Central (0) | High (+1)             | + $\alpha$             |
| A: pH                                              |         | 1.0        | 3.0      | 5.0         | 7.0                   | 9.0                    |
| B: naphthalene concentration (mg L <sup>-1</sup> ) |         | 5          | 15       | 25          | 35                    | 45                     |
| C: adsorbent mass (g)                              |         | 0.005      | 0.010    | 0.015       | 0.020                 | 0.025                  |
| D: contact time (min)                              |         | 5          | 10       | 15          | 20                    | 25                     |
| Run                                                | Factors |            |          |             | R% naphthalene        |                        |
|                                                    | A       | B          | C        | D           | Observed <sup>a</sup> | Predicted <sup>b</sup> |
| 1 (C)                                              | 5.0     | 25         | 0.015    | 15          | 85.24                 | 84.25                  |
| 2                                                  | 7.0     | 35         | 0.020    | 20          | 86.68                 | 84.36                  |
| 3                                                  | 3.0     | 35         | 0.020    | 10          | 88.10                 | 85.74                  |
| 4                                                  | 3.0     | 15         | 0.020    | 20          | 98.65                 | 100.75                 |
| 5                                                  | 3.0     | 15         | 0.010    | 10          | 66.70                 | 68.84                  |
| 6                                                  | 7.0     | 35         | 0.010    | 10          | 35.36                 | 33.08                  |
| 7                                                  | 5.0     | 5          | 0.015    | 15          | 97.40                 | 98.47                  |
| 8                                                  | 7.0     | 15         | 0.020    | 10          | 98.41                 | 98.94                  |
| 9 (C)                                              | 5.0     | 25         | 0.015    | 15          | 85.53                 | 84.25                  |
| 10                                                 | 9.0     | 25         | 0.015    | 15          | 72.38                 | 74.40                  |
| 11                                                 | 5.0     | 25         | 0.005    | 15          | 38.84                 | 37.55                  |
| 12                                                 | 1.0     | 25         | 0.015    | 15          | 93.74                 | 90.97                  |
| 13                                                 | 5.0     | 25         | 0.015    | 5           | 64.25                 | 65.79                  |
| 14 (C)                                             | 5.0     | 25         | 0.015    | 15          | 83.96                 | 84.25                  |
| 15                                                 | 7.0     | 15         | 0.010    | 20          | 73.16                 | 75.34                  |
| 16                                                 | 7.0     | 35         | 0.010    | 20          | 43.14                 | 45.93                  |
| 17                                                 | 7.0     | 35         | 0.020    | 10          | 75.24                 | 76.84                  |
| 18                                                 | 5.0     | 25         | 0.015    | 25          | 89.78                 | 87.49                  |
| 19                                                 | 7.0     | 15         | 0.010    | 10          | 75.54                 | 72.12                  |
| 20                                                 | 5.0     | 45         | 0.015    | 15          | 64.71                 | 62.90                  |
| 21                                                 | 7.0     | 15         | 0.020    | 20          | 99.22                 | 96.84                  |
| 22                                                 | 3.0     | 15         | 0.010    | 20          | 83.69                 | 83.02                  |
| 23 (C)                                             | 5.0     | 25         | 0.015    | 15          | 86.67                 | 84.25                  |
| 24                                                 | 3.0     | 35         | 0.020    | 20          | 99.87                 | 104.22                 |
| 25                                                 | 5.0     | 25         | 0.025    | 15          | 98.49                 | 99.04                  |
| 26                                                 | 3.0     | 35         | 0.010    | 10          | 42.44                 | 45.75                  |
| 27 (C)                                             | 5.0     | 25         | 0.015    | 15          | 81.67                 | 84.25                  |
| 28 (C)                                             | 5.0     | 25         | 0.015    | 15          | 82.41                 | 84.25                  |
| 29                                                 | 3.0     | 15         | 0.020    | 10          | 93.75                 | 91.89                  |
| 30                                                 | 3.0     | 35         | 0.010    | 20          | 70.26                 | 69.55                  |

46

47 C: Center point, <sup>a</sup> Experimental values of response. <sup>b</sup> Predicted values of response by RSM proposed model.

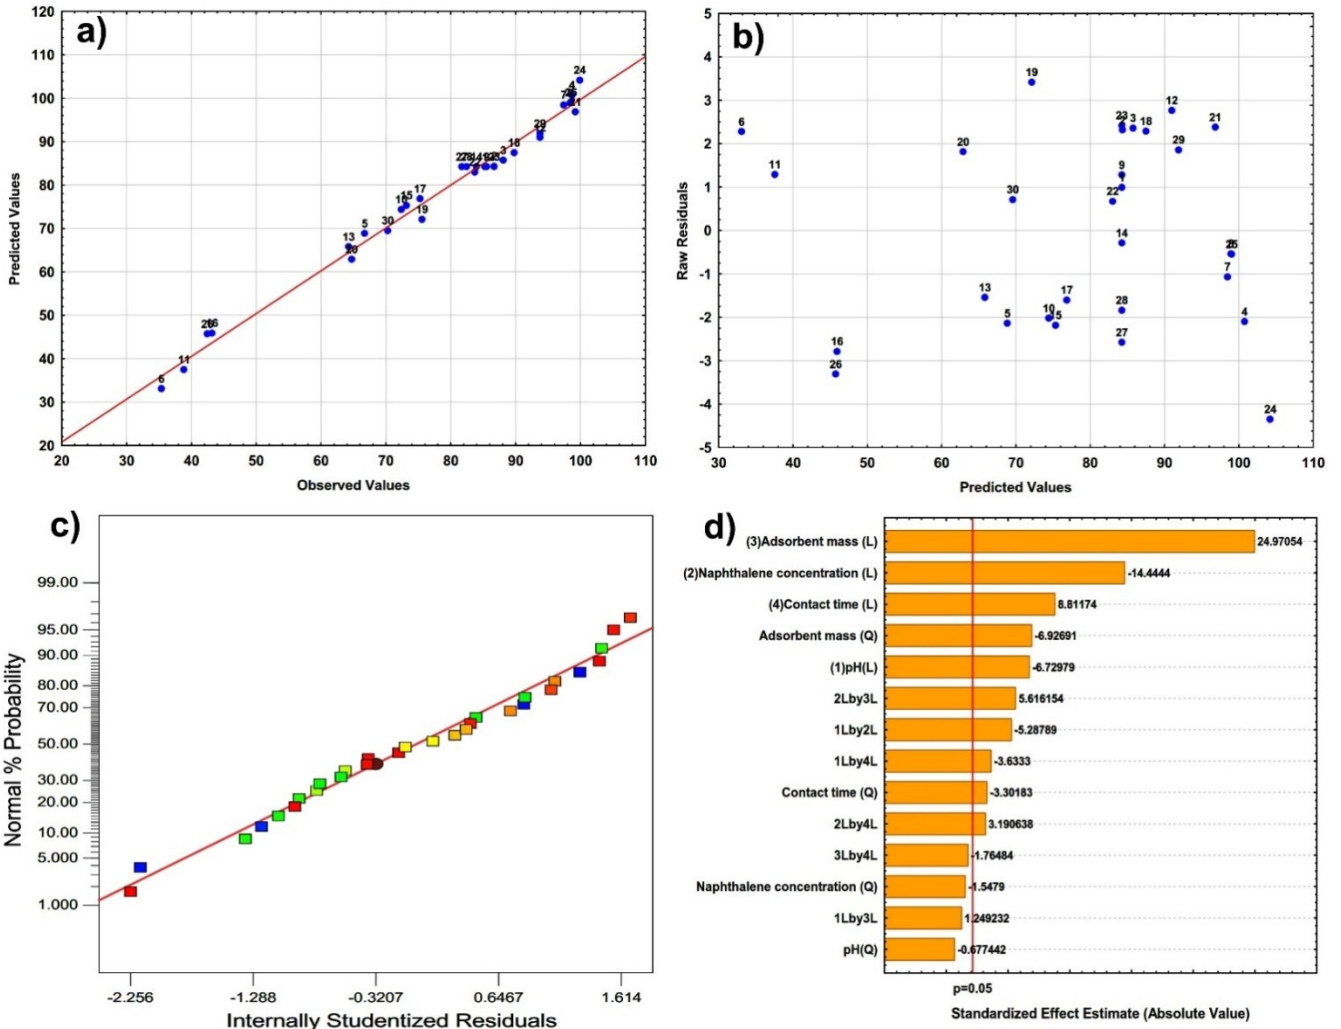

**Fig. S1.** (a) Comparison of model predictions with the experimental data, (b) predicted value of naphthalene adsorption vs. residual effects, (c) normal % probability versus internally studentized residuals and (d) Pareto chart for adsorption efficiency.

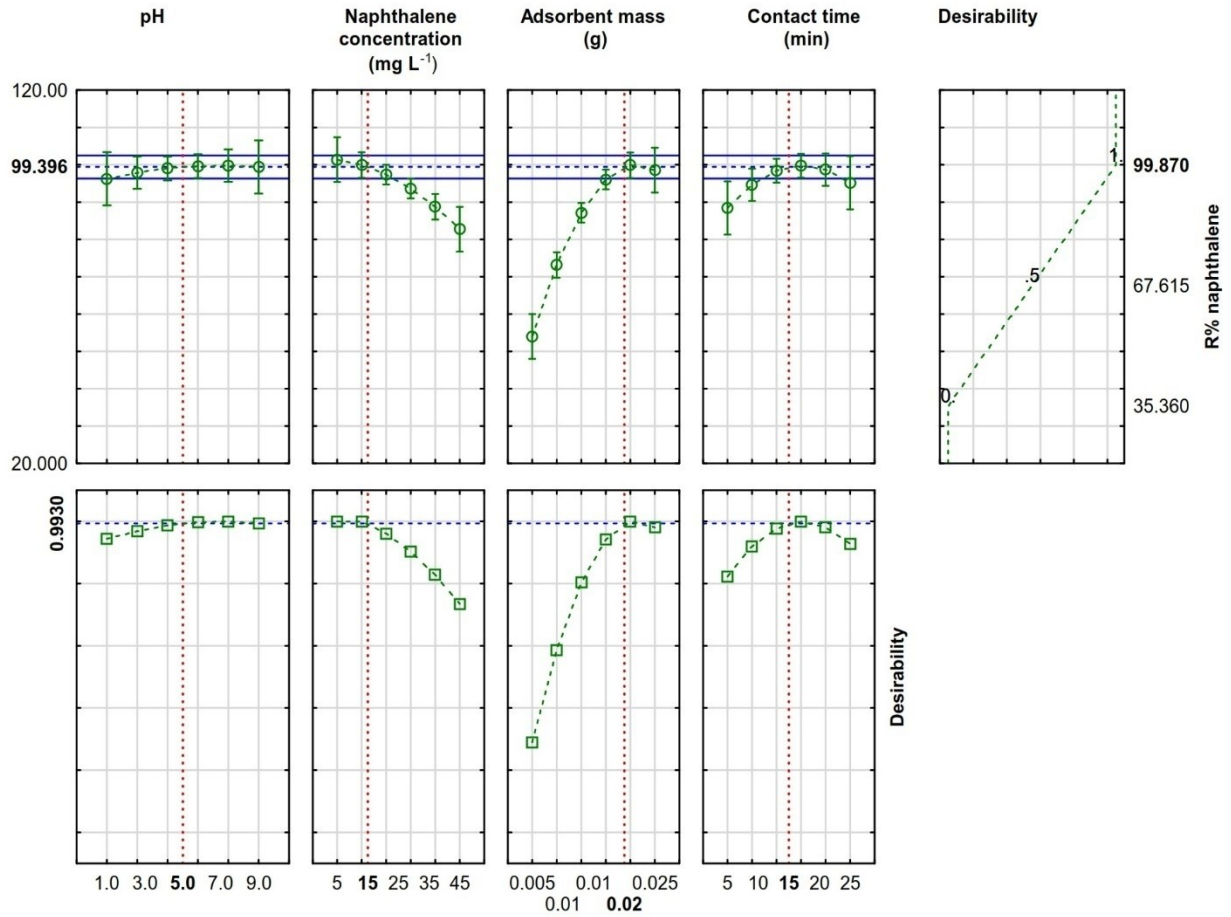

**Fig. S2.** Profiles for predicted values and desirability function for the removal percentage of naphthalene onto ZnS-NPs-AC. Dashed line indicated current values after optimization.

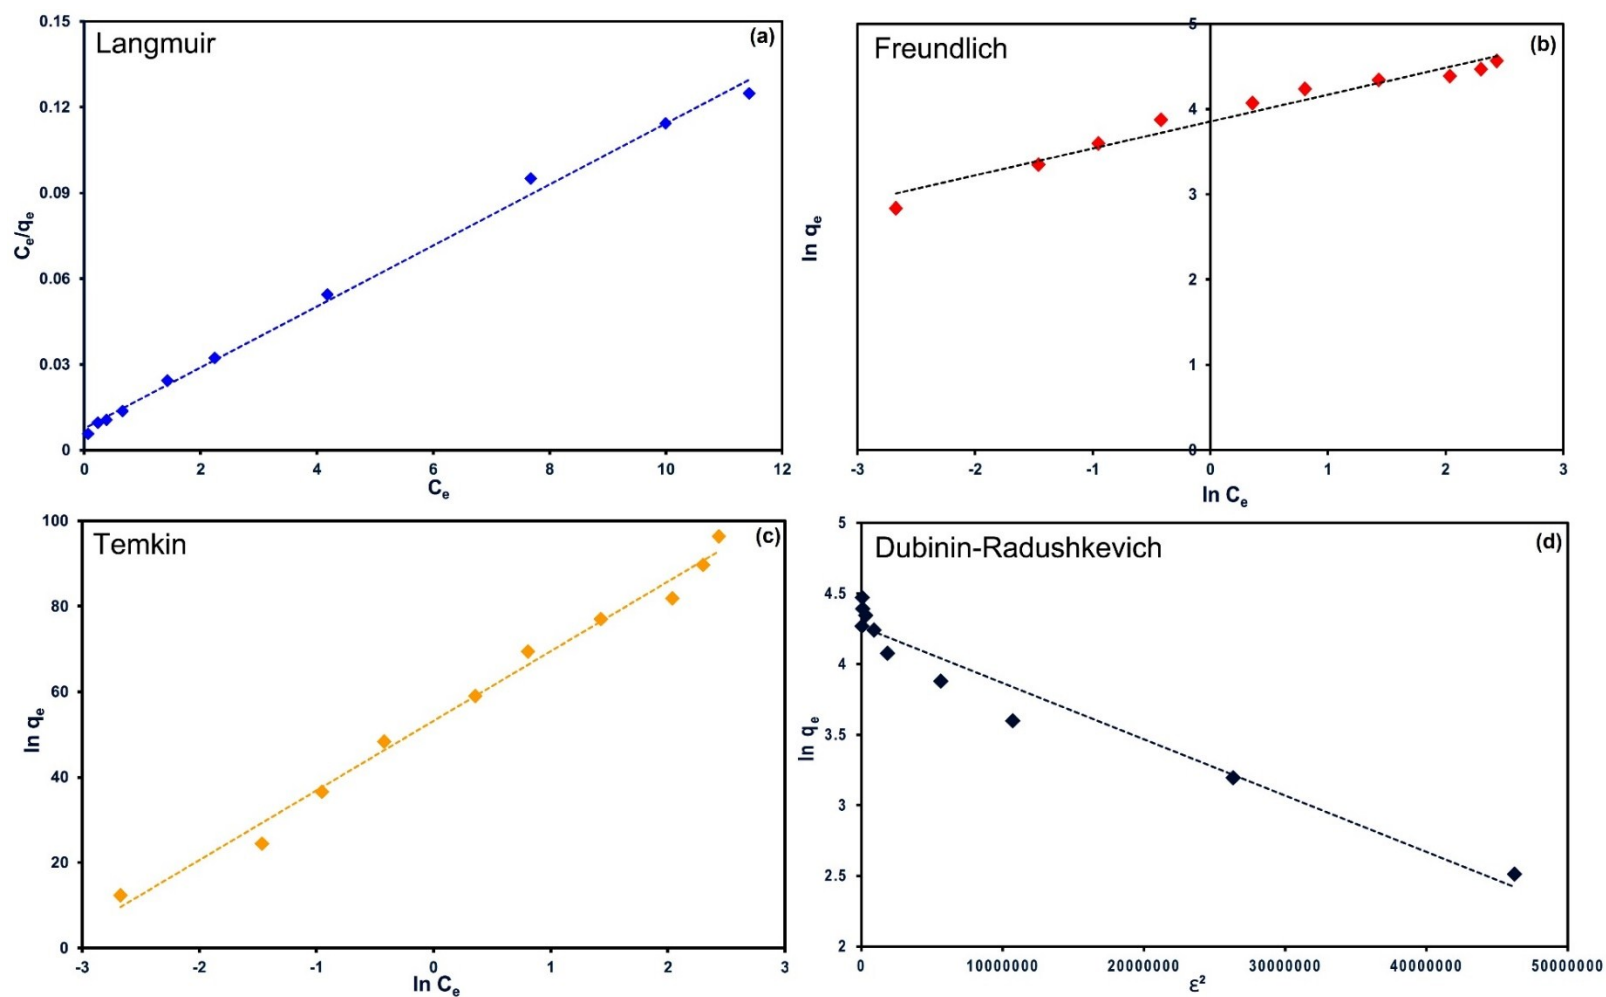

**Fig. S3.** (a) Langmuir, (b) Freundlich, (c) Temkin and (d) Dubinin–Radushkevich adsorption isotherms for adsorption of naphthalene onto ZnS-NPs-AC (Initial naphthalene concentration = 5 to 50 mg L<sup>-1</sup>, adsorbent mass: 0.02 g, sonication time: 15 min and pH: 5.0).
